# Supplementary material for: A phosphonated phenol-formaldehyde-based high-temperature proton exchange membrane with intrinsic protonic conductors and proton transport channels
Source: Royal Society of Chemistry journal article supplement (doi:10.1039/d2ta00986b), 2022-01-01
Supplement: d2ta00986b1.pdf [file d2ta00986b1.pdf]

## Supporting information

### Phosphonated Phenol-formaldehyde Based High-temperature Proton Exchange Membrane with Intrinsic Protonic Conductors and Proton Transport Channels

Xiaofeng Hao,<sup>a</sup> Zhen Li,<sup>a</sup> Min Xiao,<sup>a</sup> Dongmei Han,<sup>a</sup> Sheng Huang,<sup>a</sup> Guan Xi,<sup>a</sup> Shuanjin Wang,<sup>\* a</sup> and Yuezhong Meng<sup>\* a</sup>

The Key Laboratory of Low-carbon Chemistry & Energy Conservation of Guangdong Province, State Key Laboratory of Optoelectronic Materials and Technologies, School of Materials Science and Engineering, Sun Yat-sen University, Guangzhou 510275, China

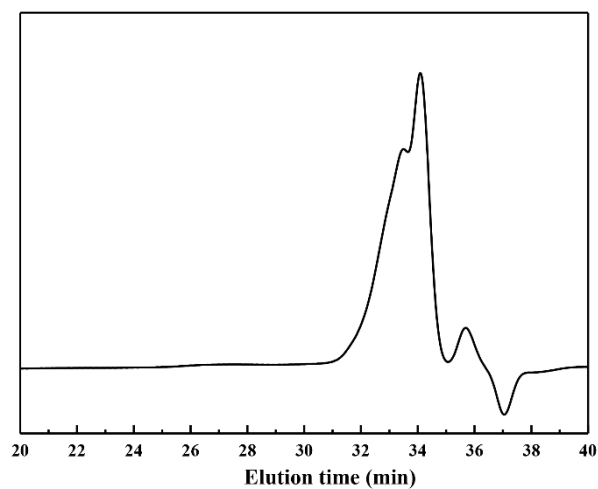

Fig. S1 GPC chart of phenol-formaldehyde oligomer.

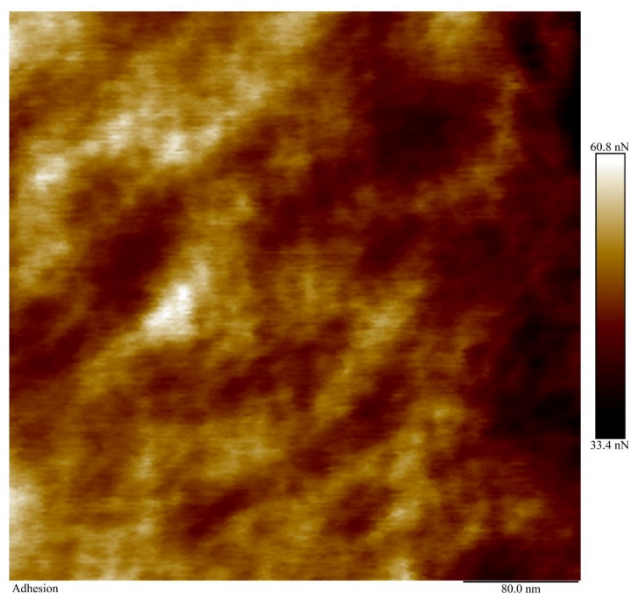

Fig. S2. AFM images of 40PPF-Na/PBI membrane

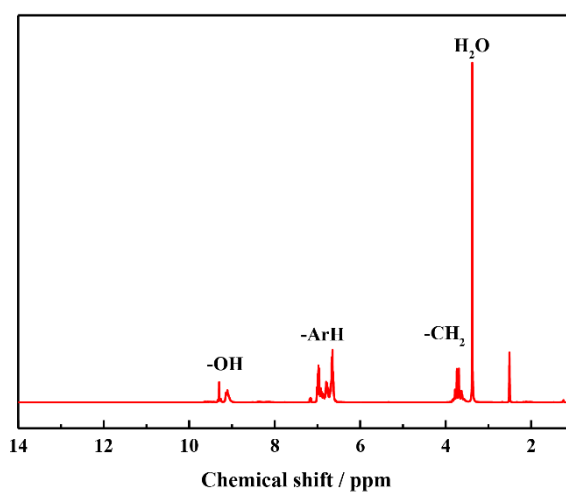

Fig. S3.  $^1\text{H-NMR}$  spectrum of phenol-formaldehyde oligomer in  $\text{DMSO-d}_6$ .

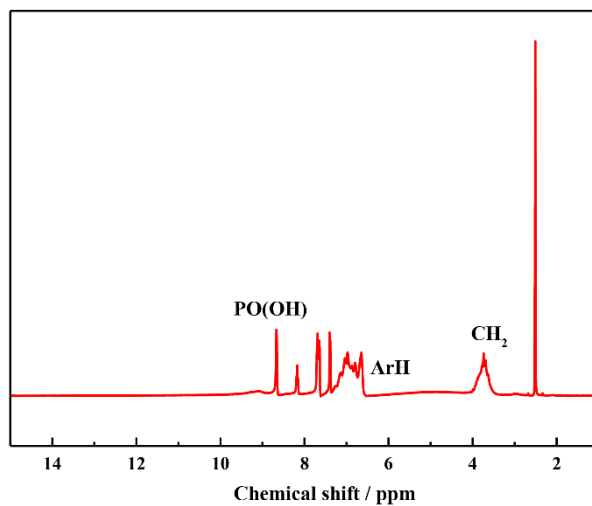

Fig. S4.  $^1\text{H}$ -NMR spectrum of phosphonated phenol-formaldehyde oligomer in  $\text{DMSO-}d_6$ .

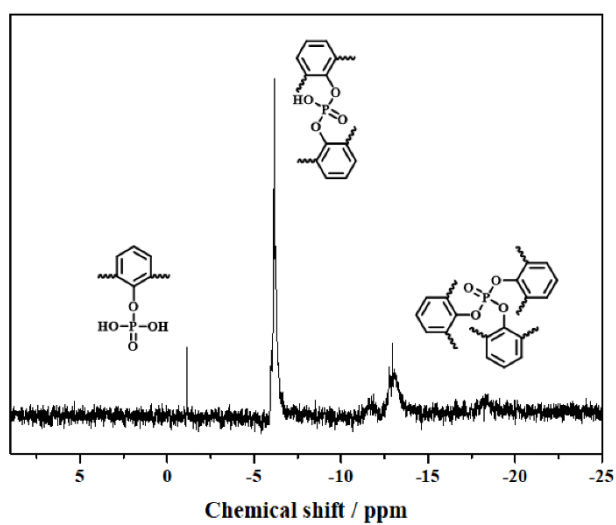

Fig. S5  $^{31}\text{P}$ -NMR spectrum of phosphonated phenol-formaldehyde oligomer in  $\text{DMSO-}d_6$

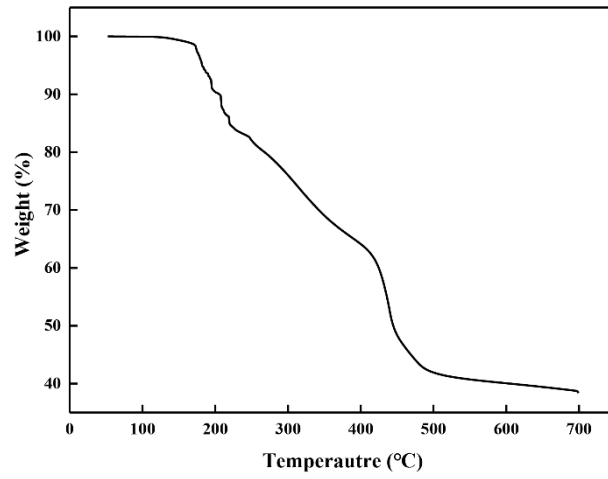

Fig. S6 Thermogravimetric curve of phosphonated phenol-formaldehyde oligomer in N<sub>2</sub> atmosphere.

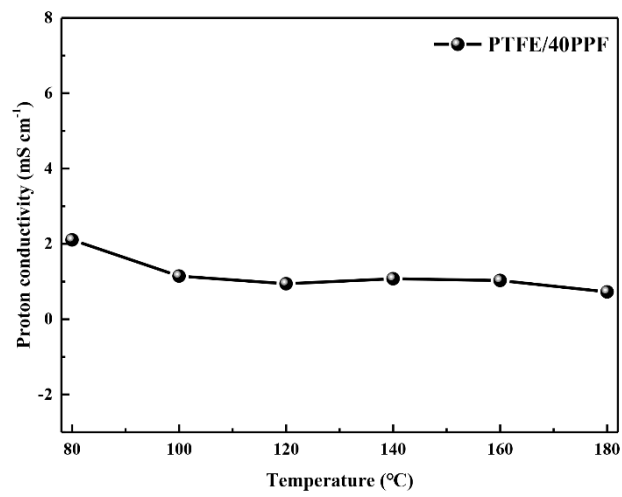

Fig. S7 Proton conductivity of PTFE/40PPF.

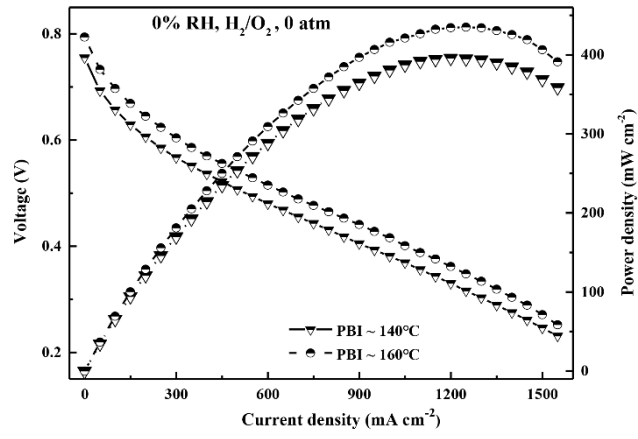

Fig. S8 Single cell performance of PBI membrane at 140°C and 160°C without humidification.
